# Supplementary material for: The Parkinson’s disease risk gene cathepsin B promotes fibrillar alpha-synuclein clearance, lysosomal function and glucocerebrosidase activity in dopaminergic neurons
Source: PubMed Central journal article supplement (PMC11587650; doi:10.1186/s13024-024-00779-9), 2024-11-25

# Supplemental Figure 1

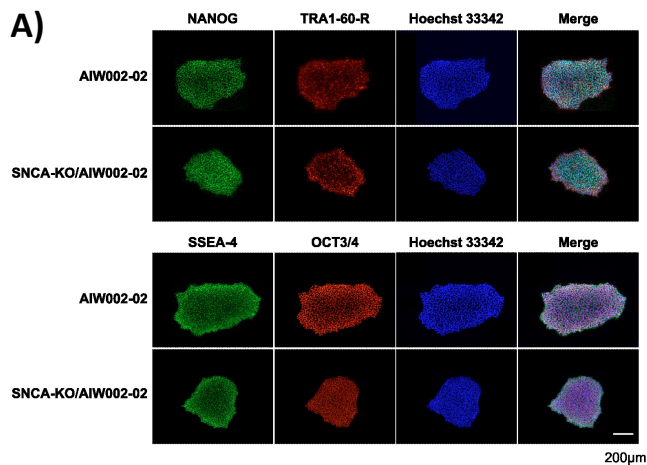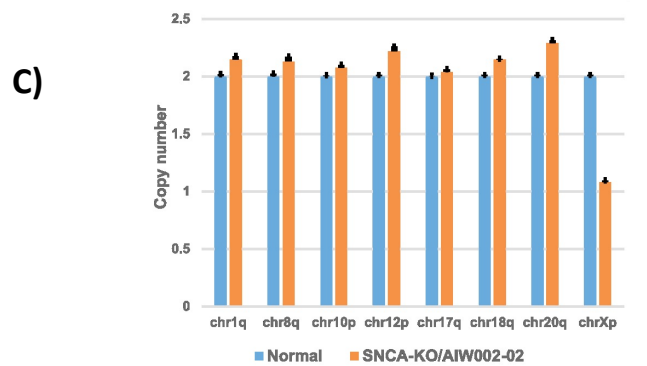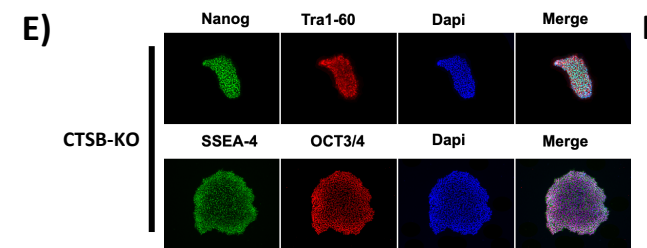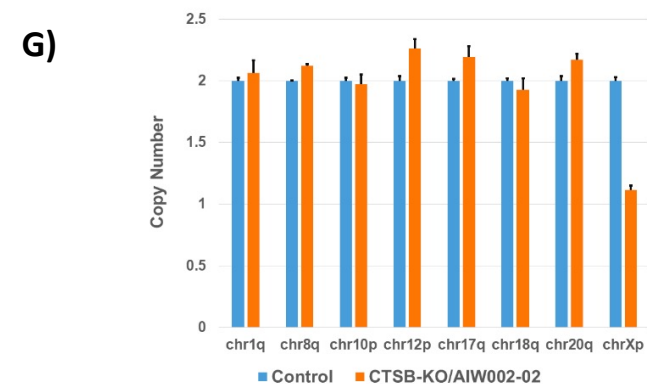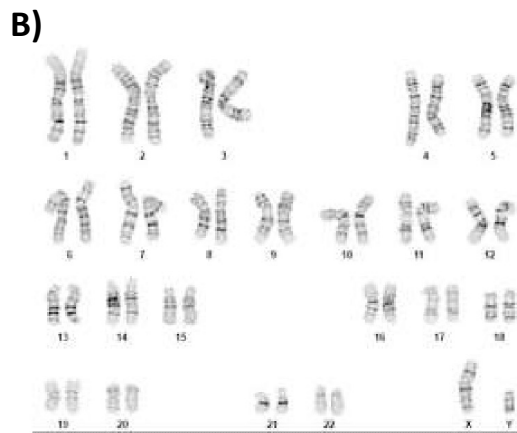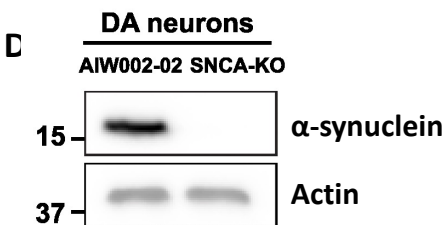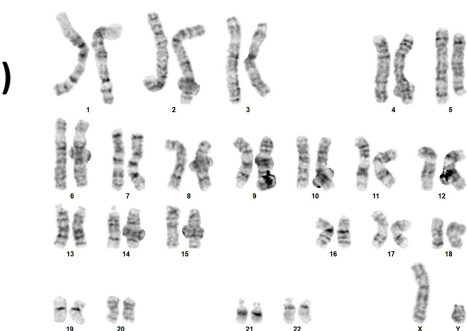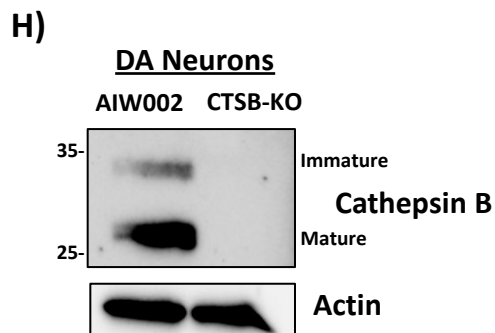

# Supplementary Figure 2

A)

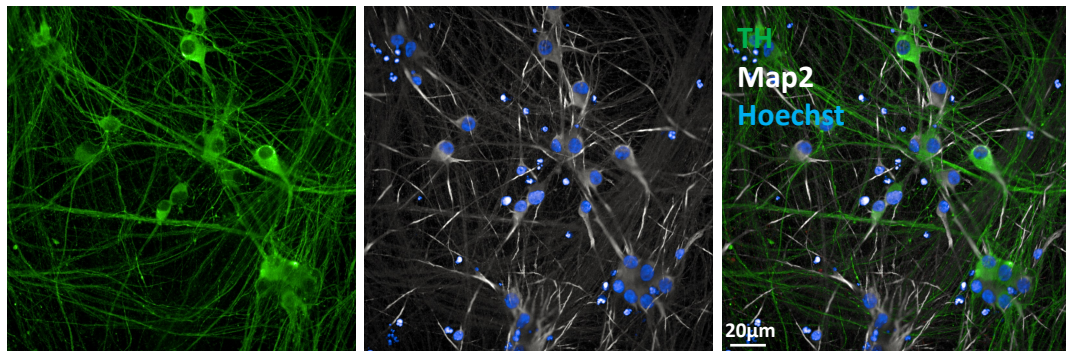

B)

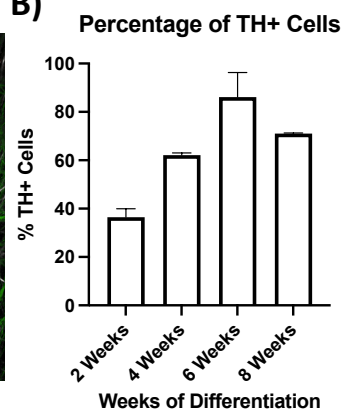

C)

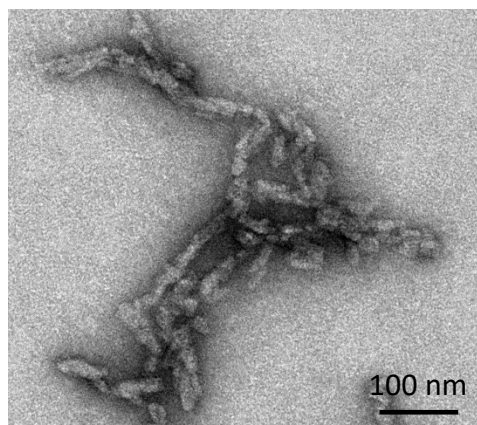

D)

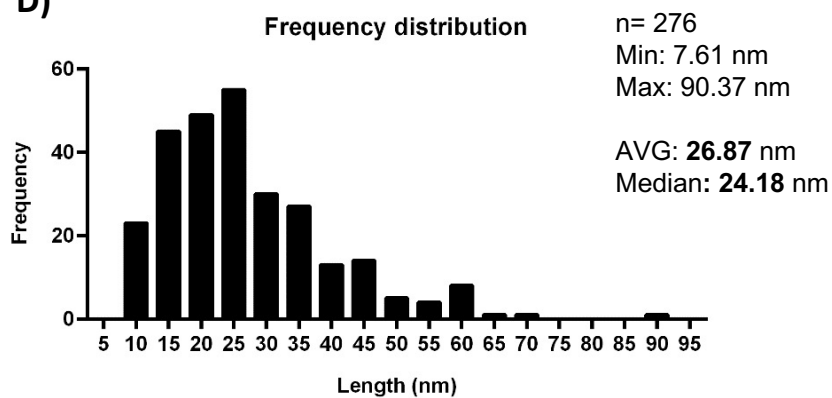

# Supplementary Figure 3

A)

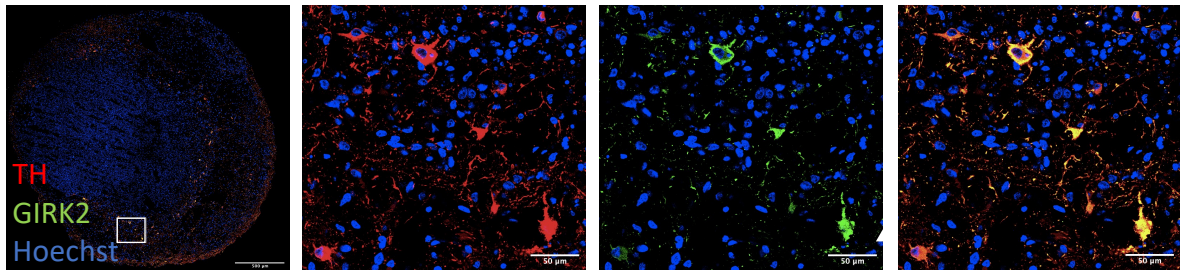

B)

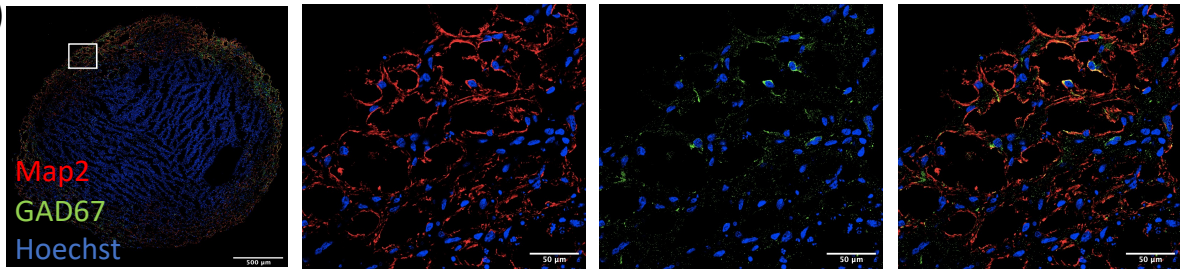

C)

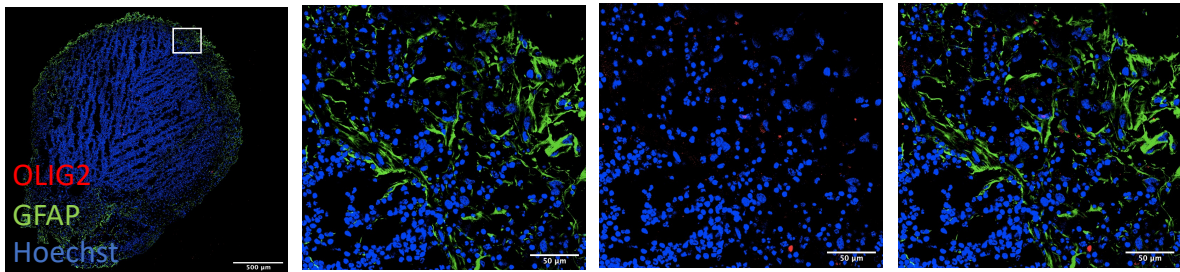

D)

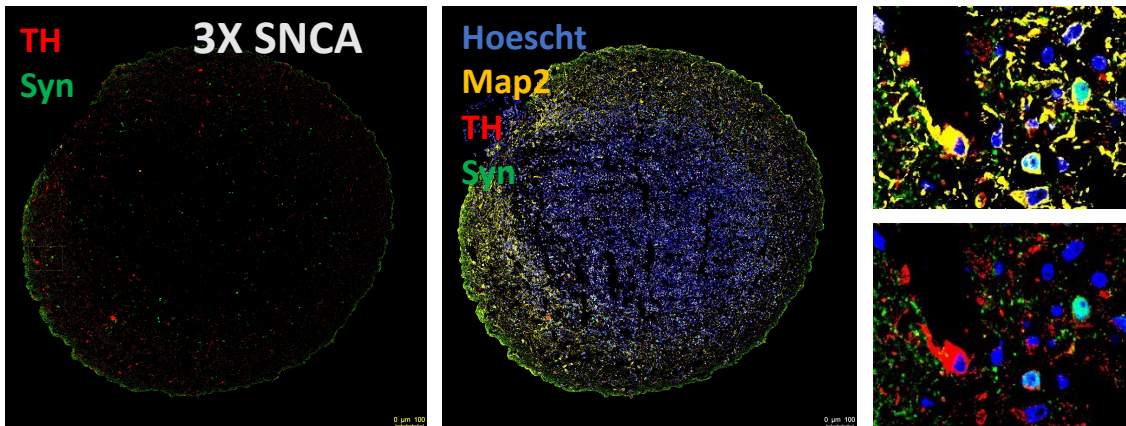

E)

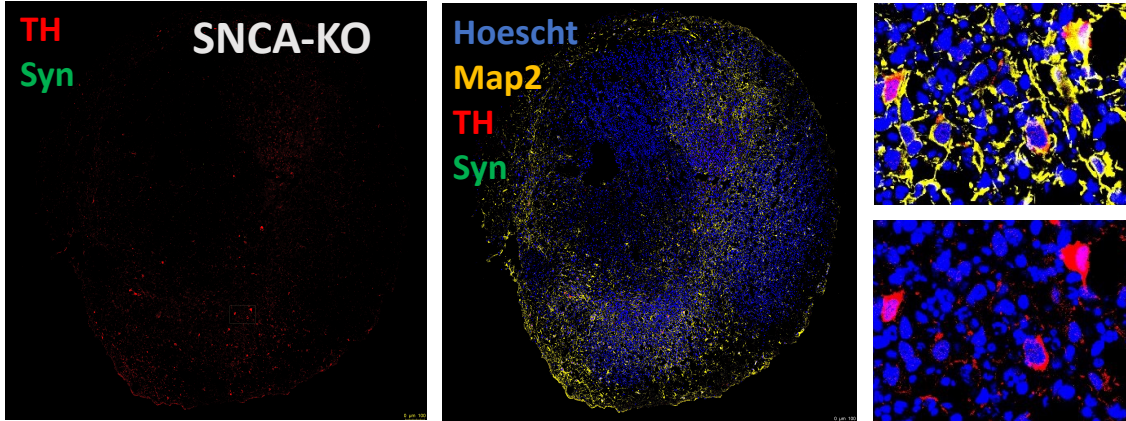

# Figure 1

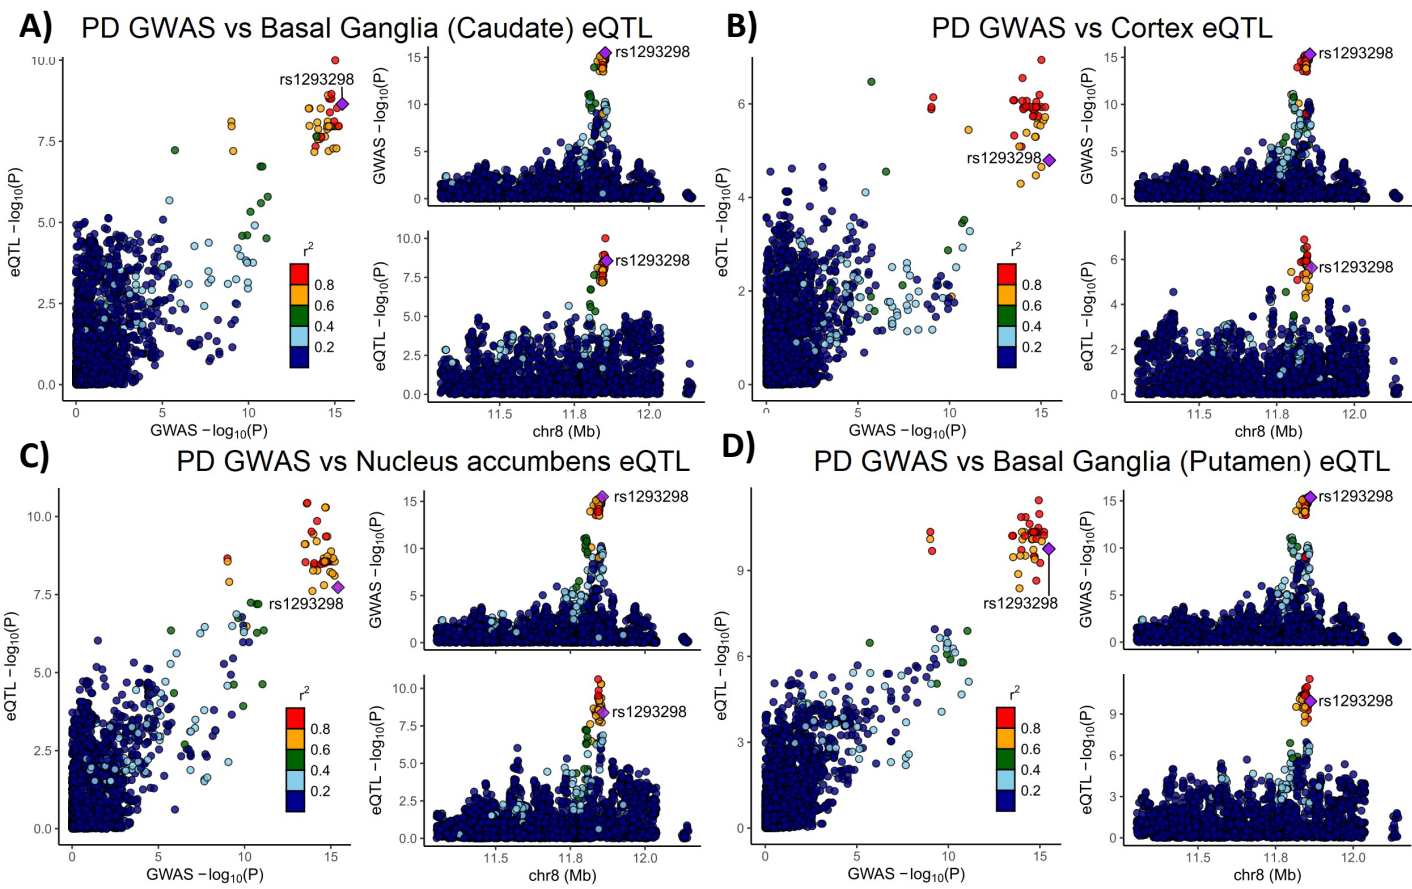

**Figure 2**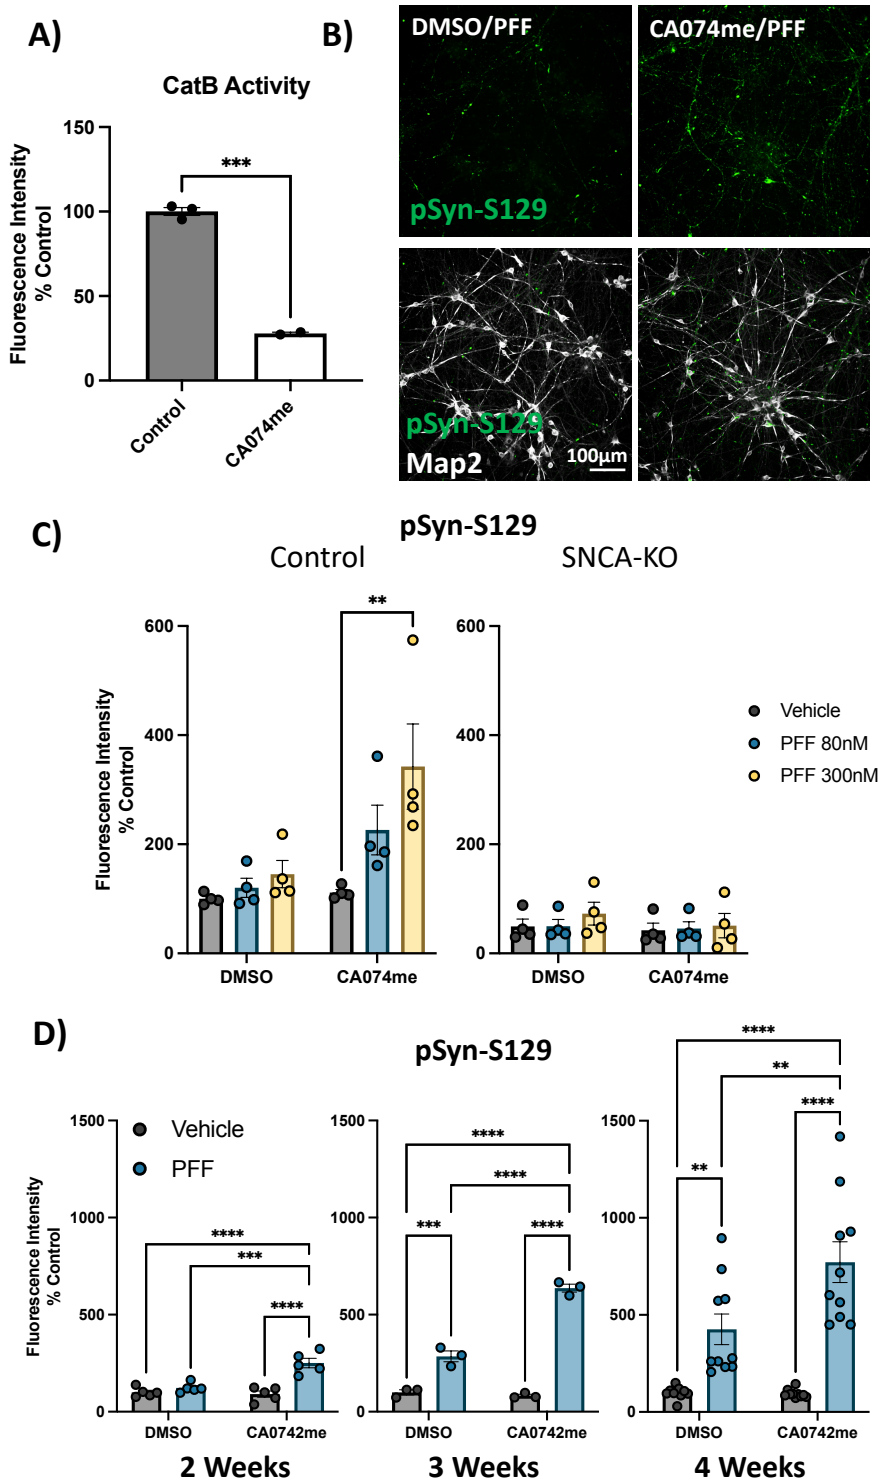

# Supplemental Figure 4

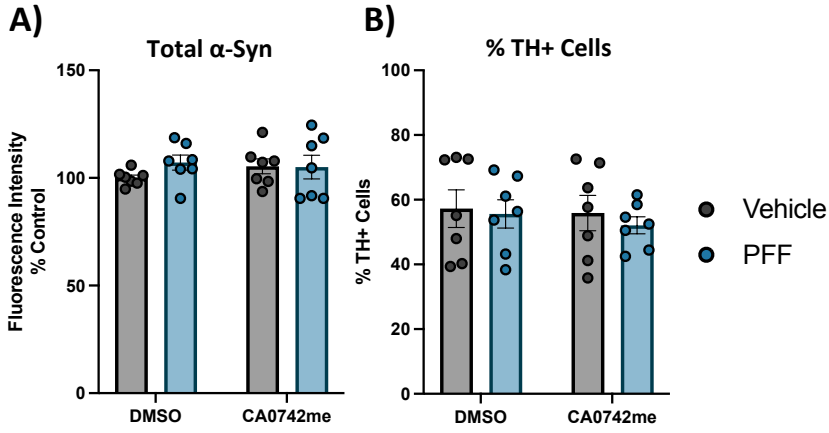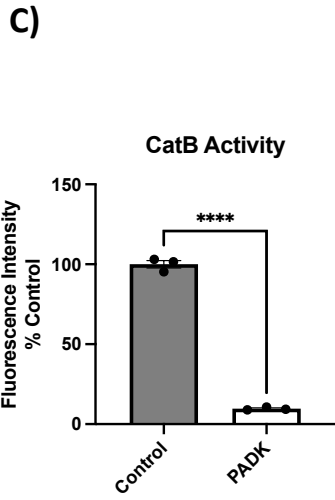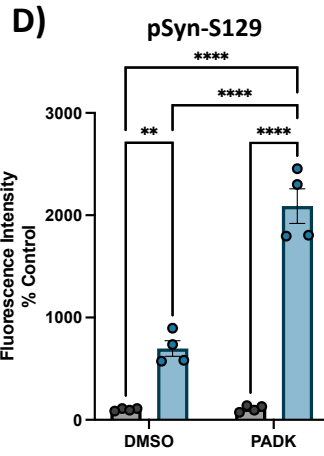

# Figure 3

A)

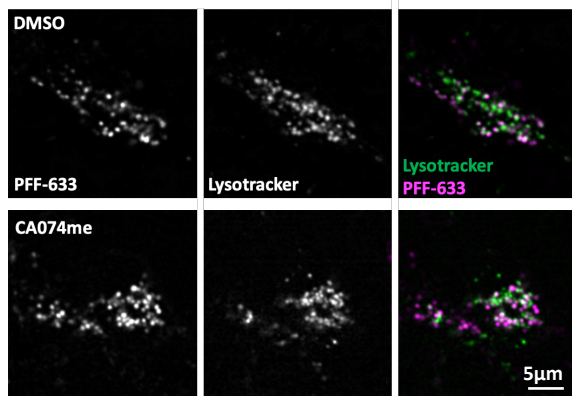

B)

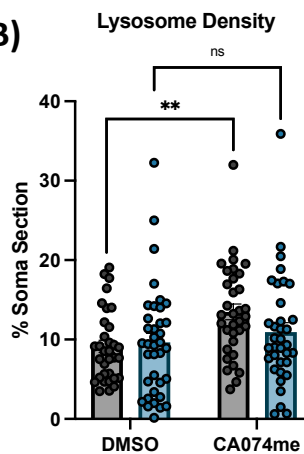

C)

● Vehicle  
● PFF

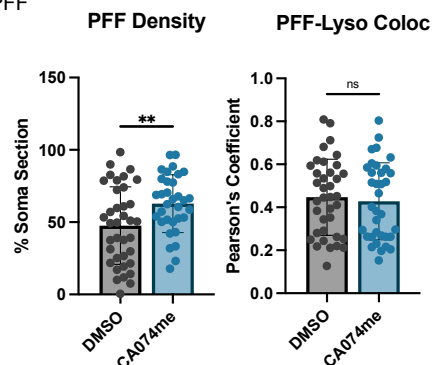

D)

E)

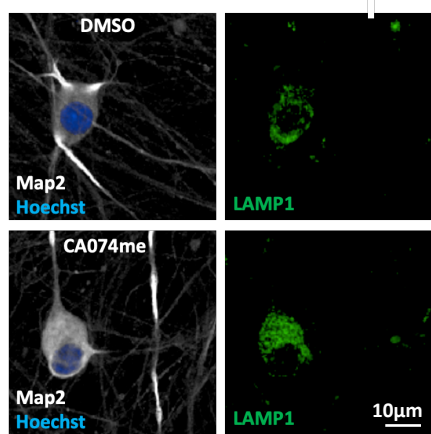

F)

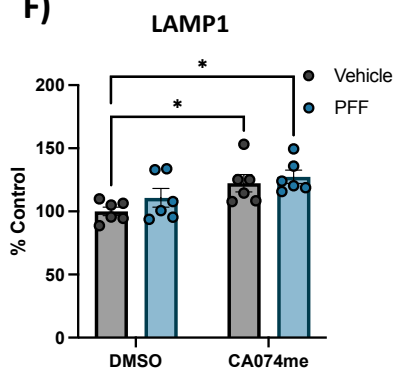

G)

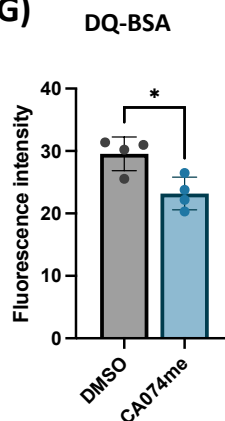

H) Neuritic Velocity

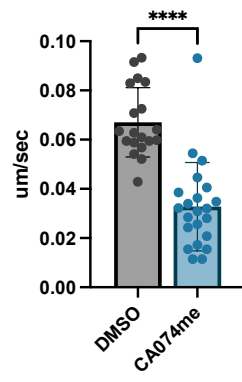

I)

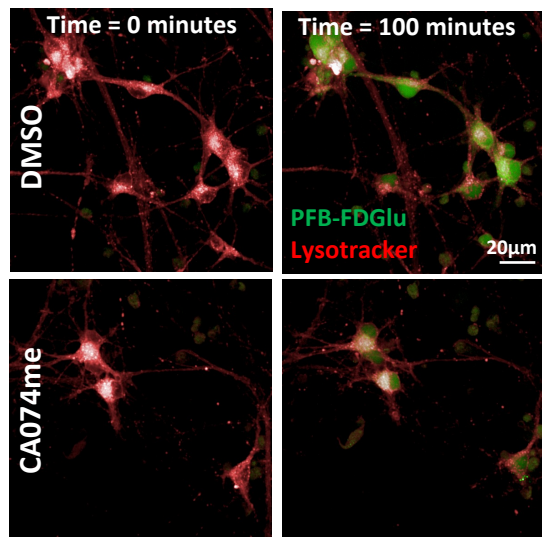

J)

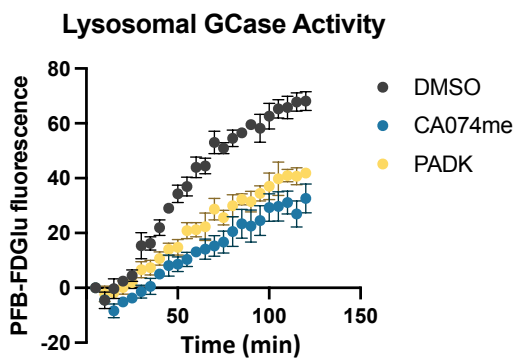

K)

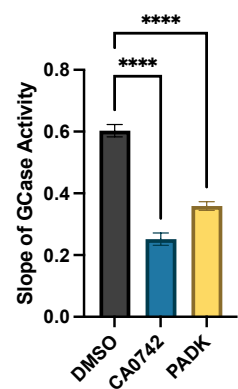

# Supplemental Figure 5

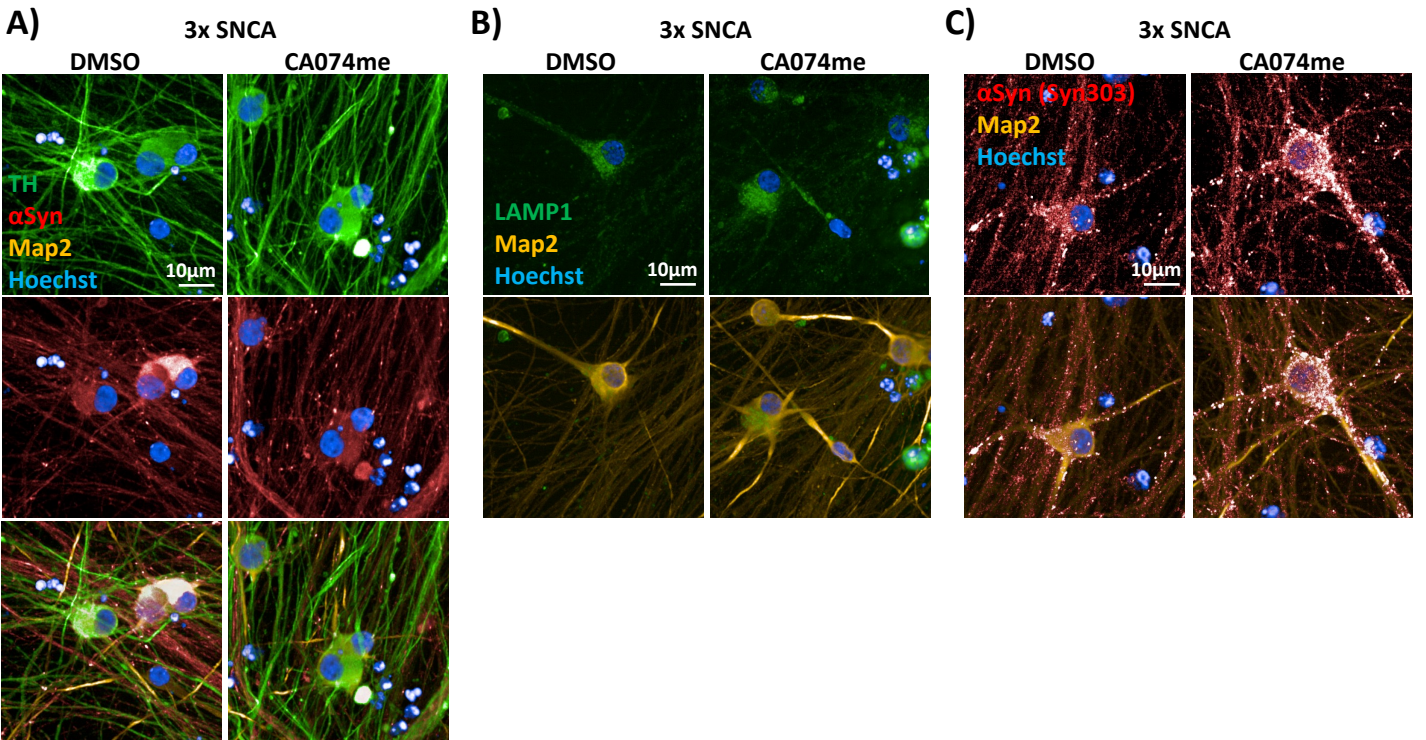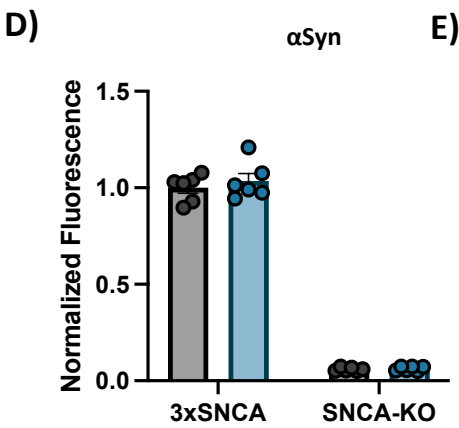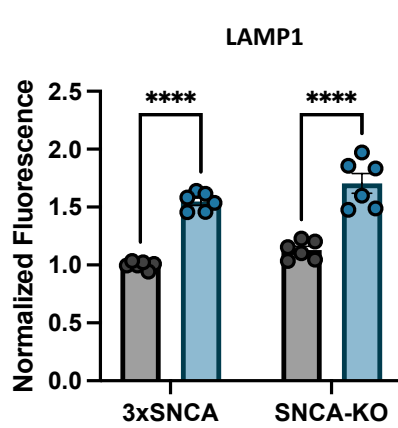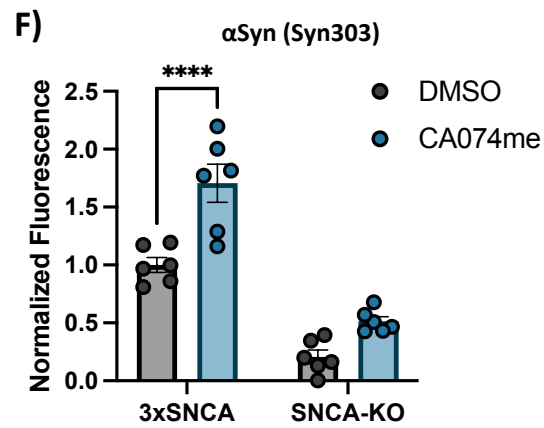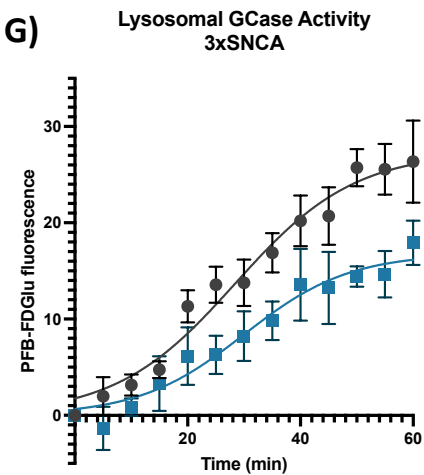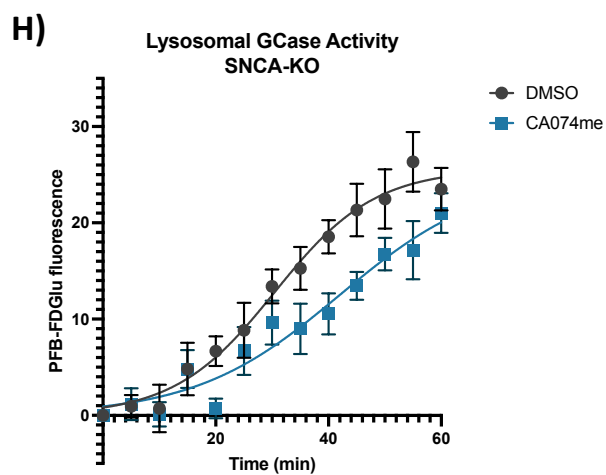



**Figure 4**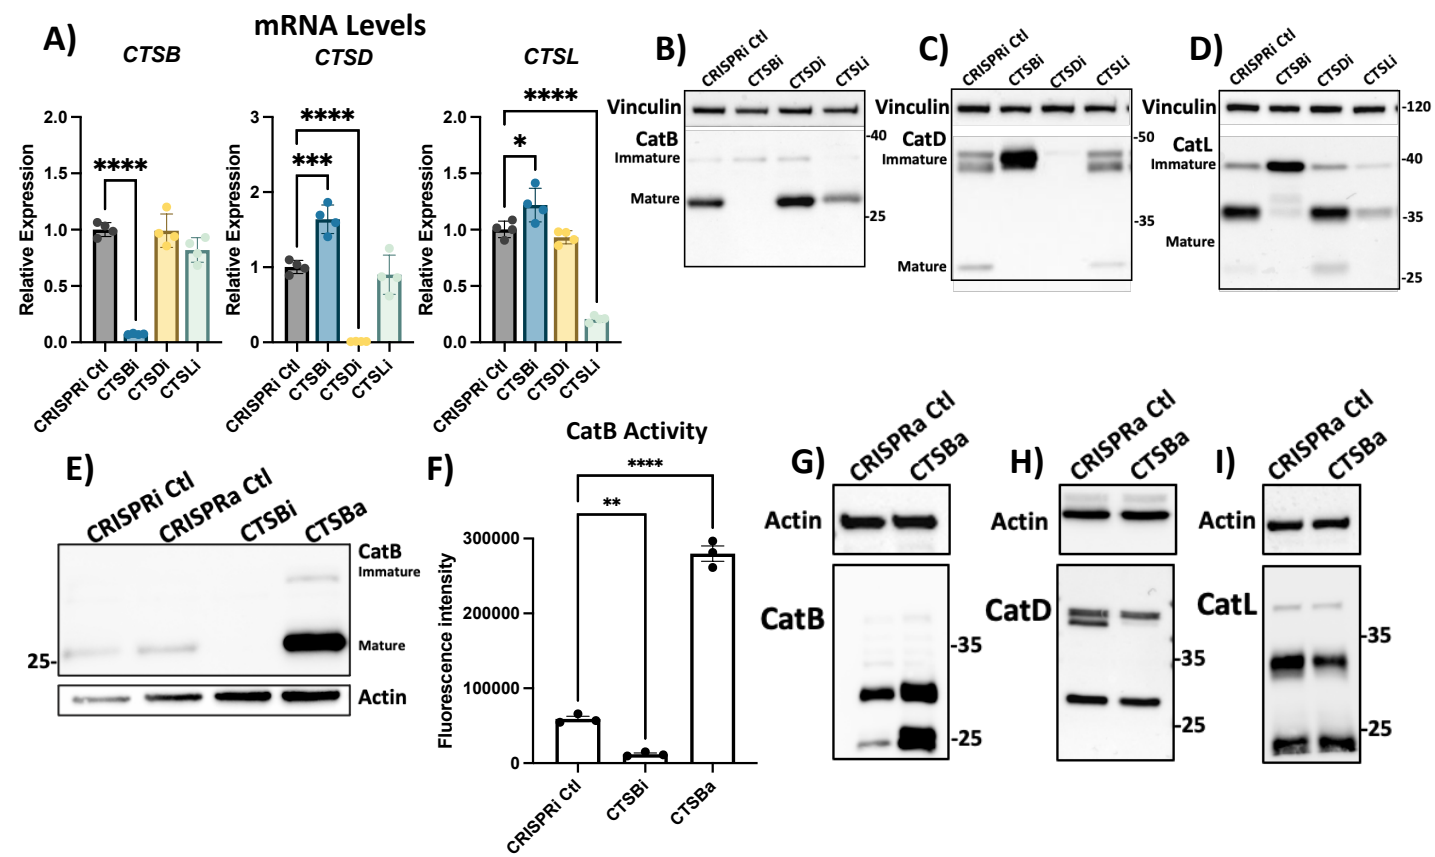

# Figure 5

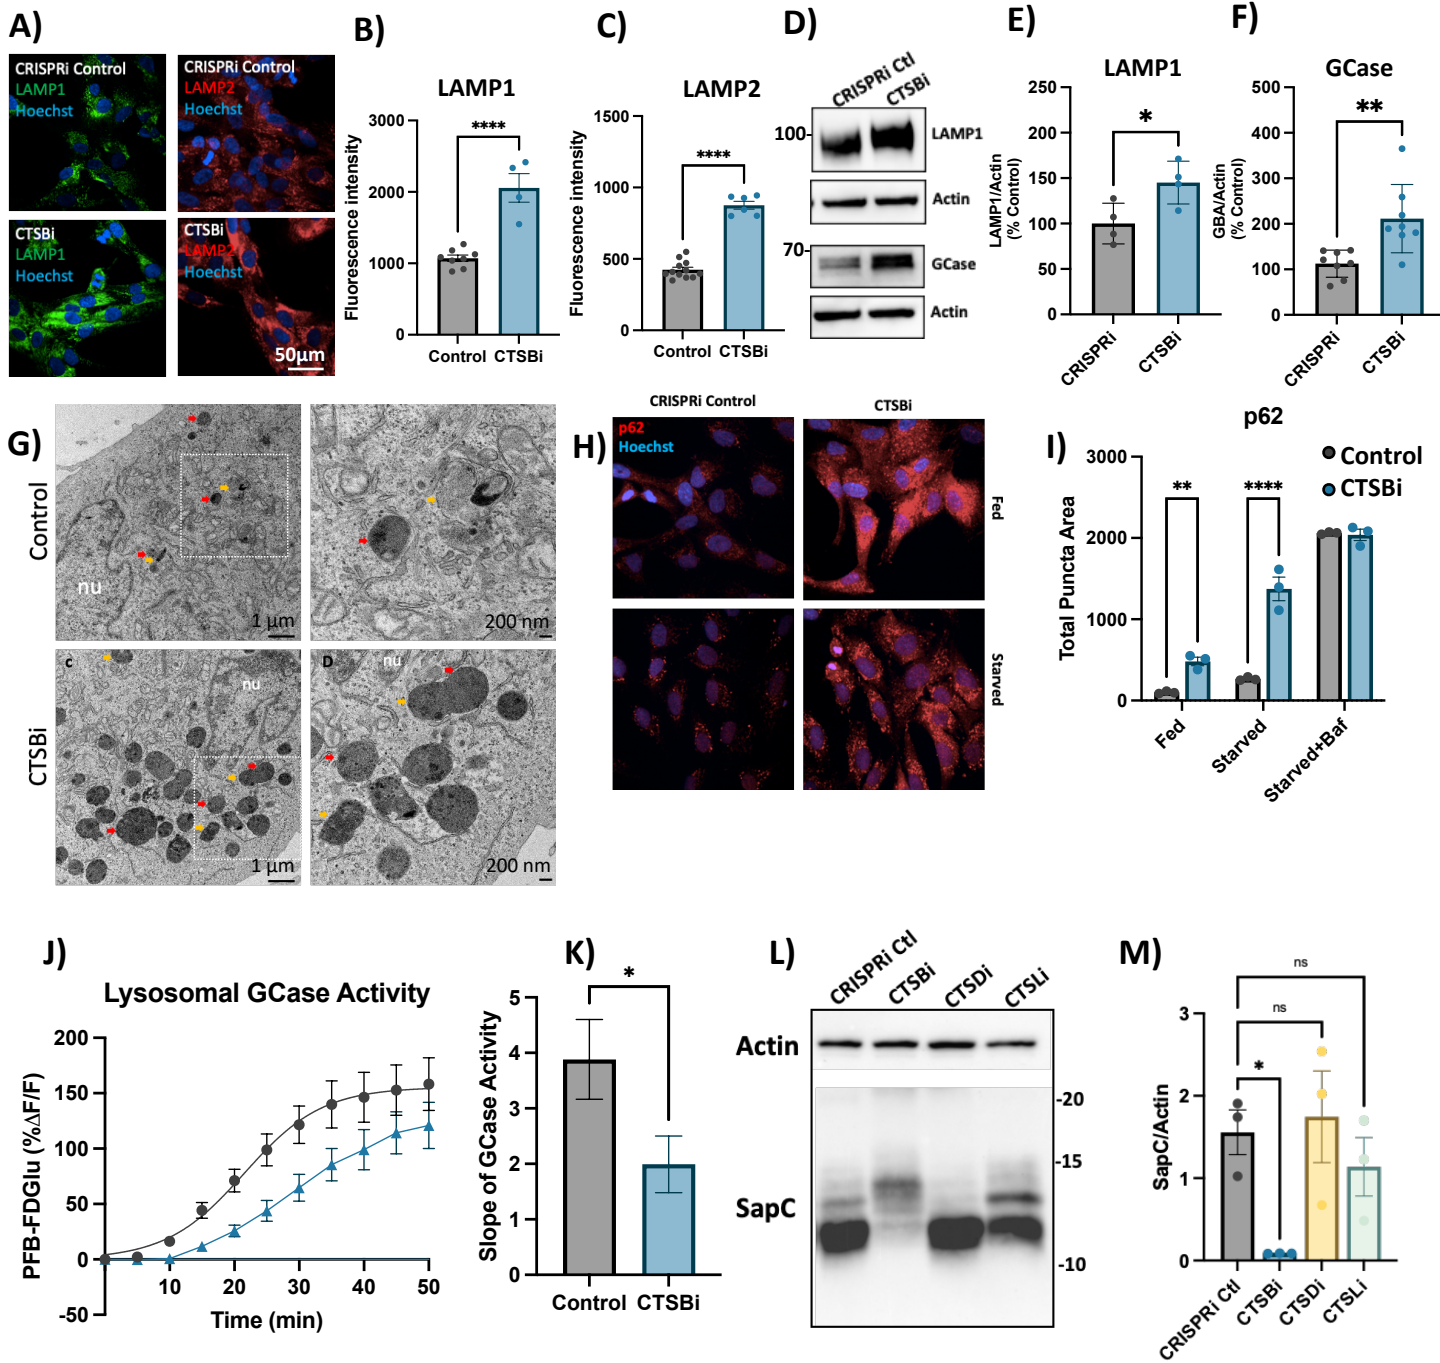

# Supplemental Figure 6:

**A) LC3B Levels in RPE1 Cells    p62 Levels in RPE1 Cell Knockdowns**

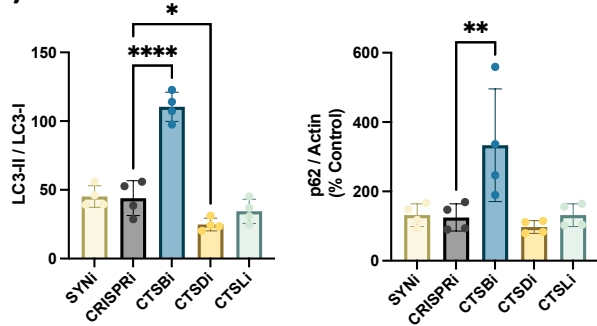

**B)**

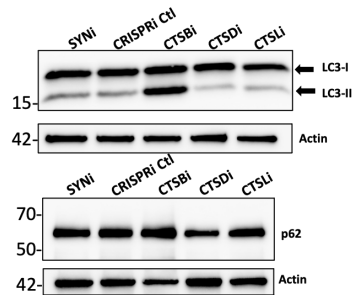

**C)**

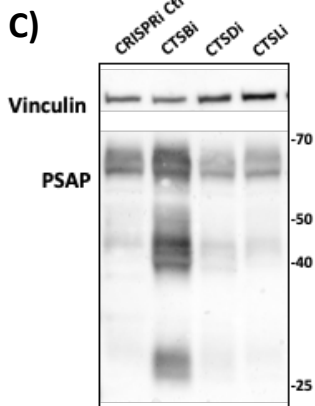

**D)**

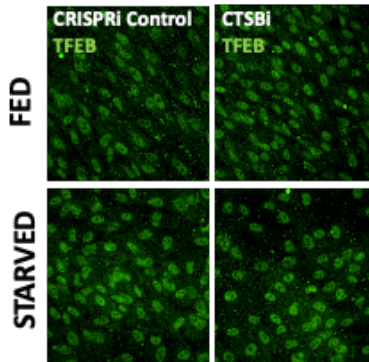

**E)**

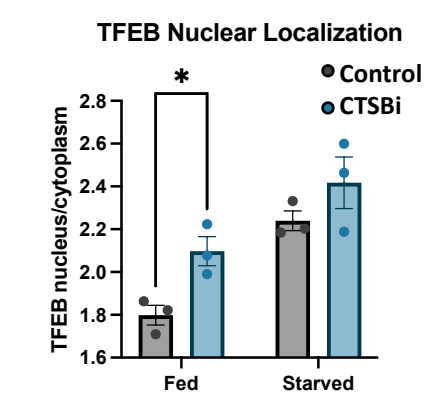

**F)**

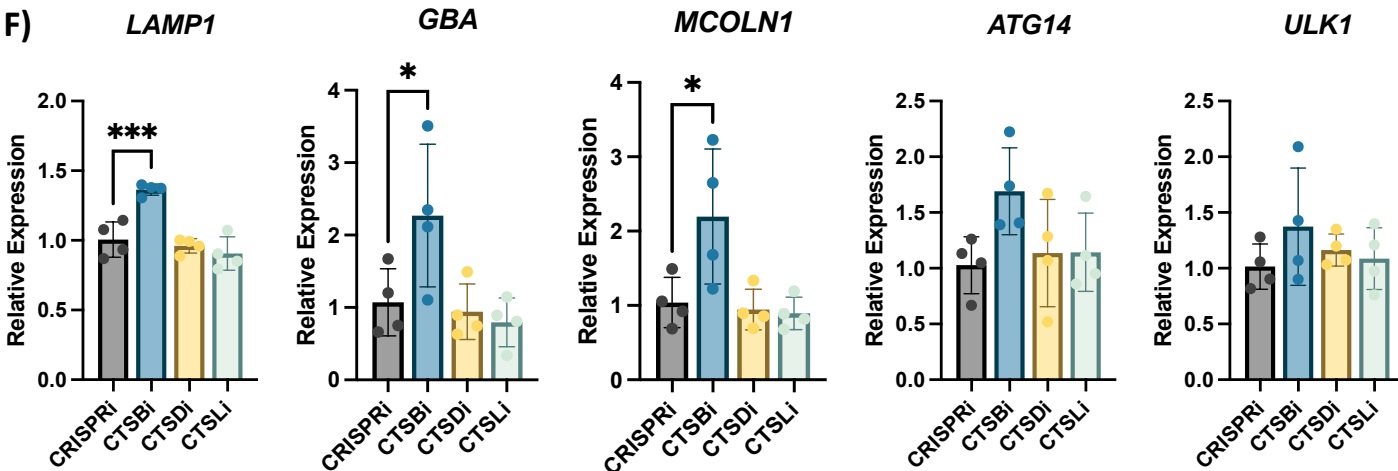

**Figure 6**

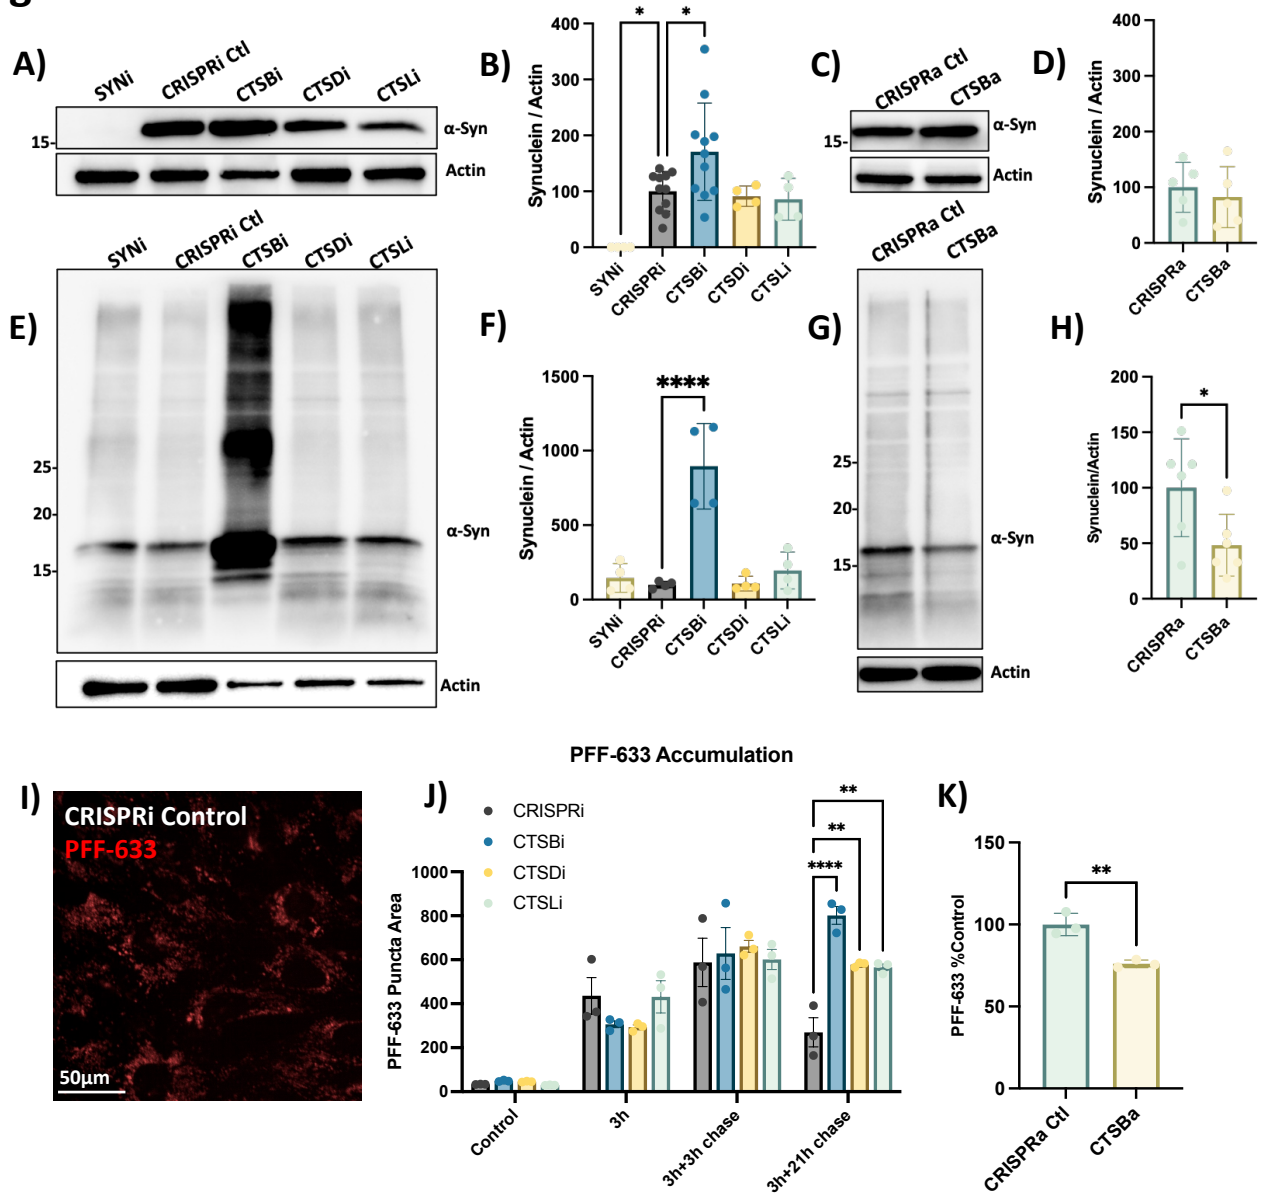

# Supplemental Figure 7

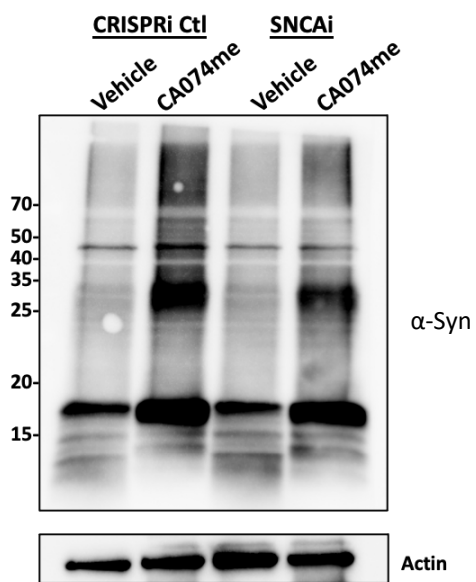

# Figure 7

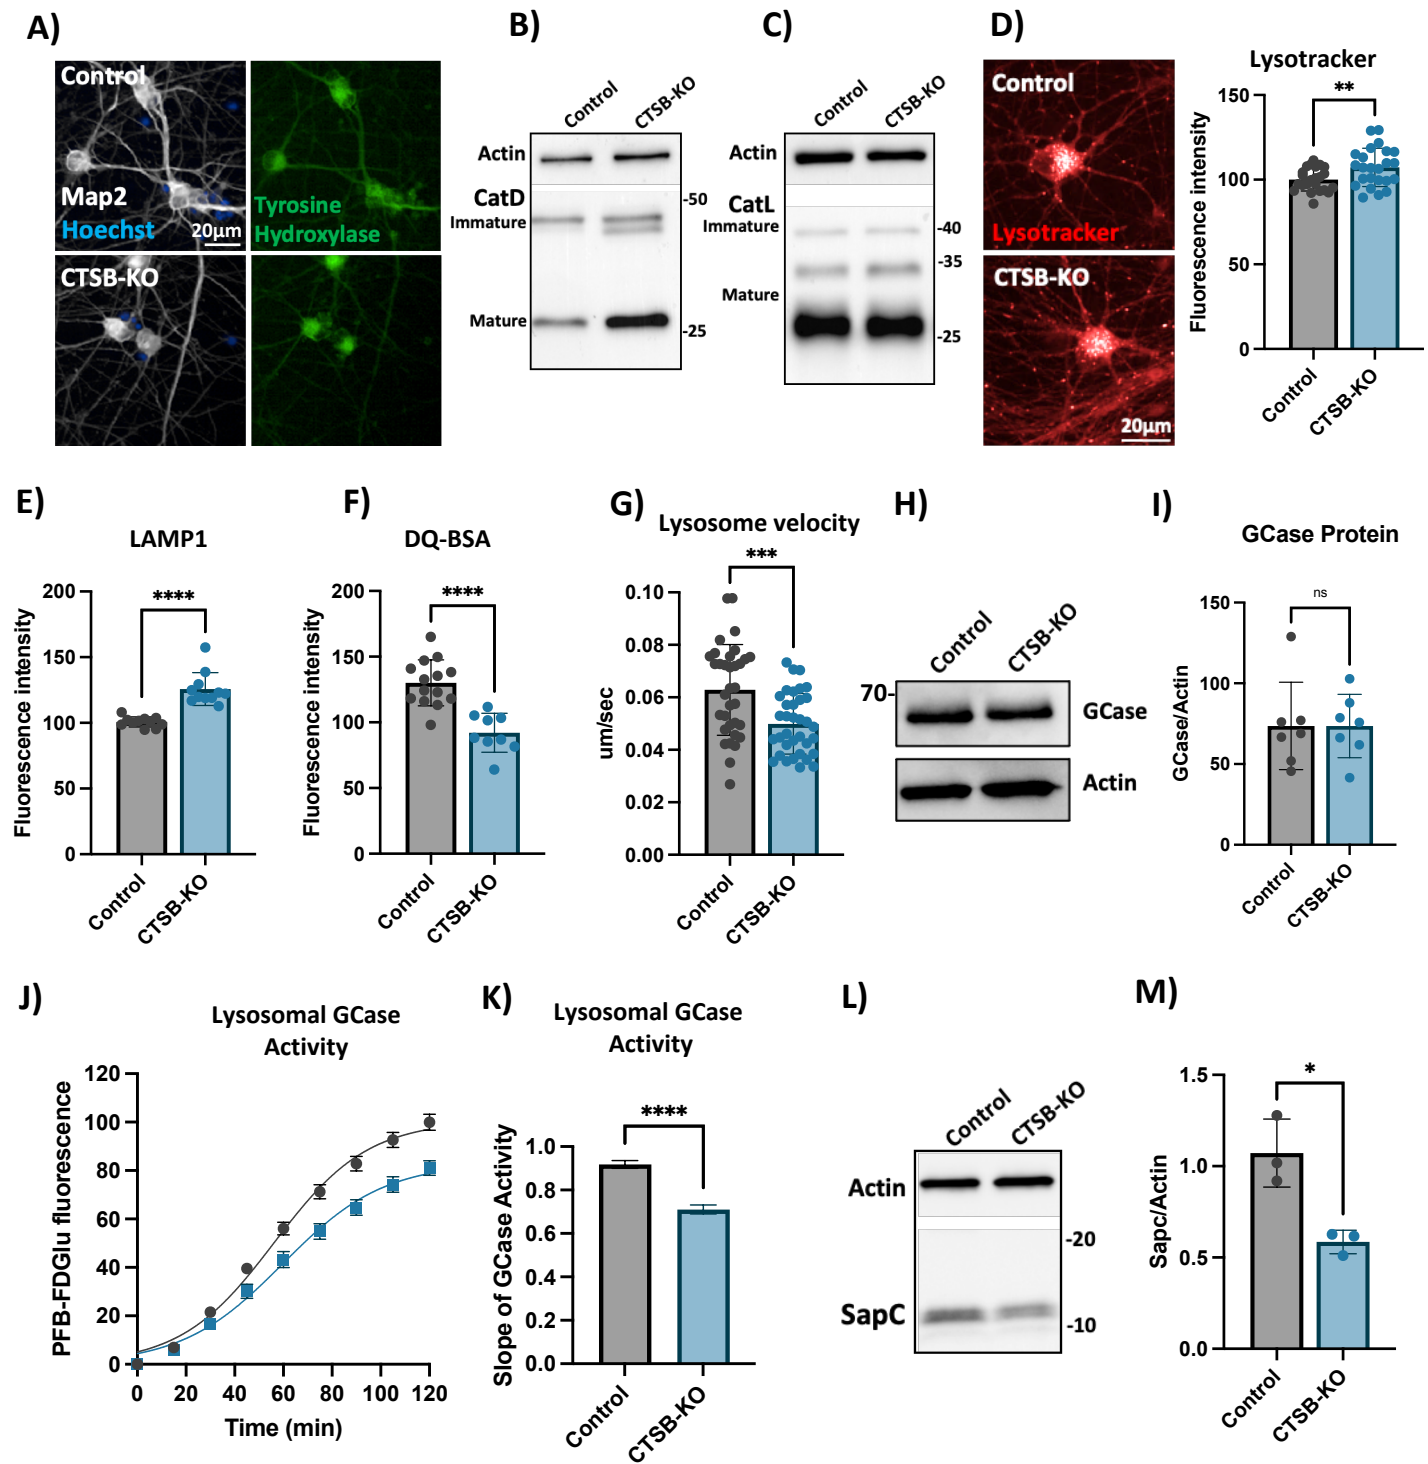

# Supplemental Figure 8

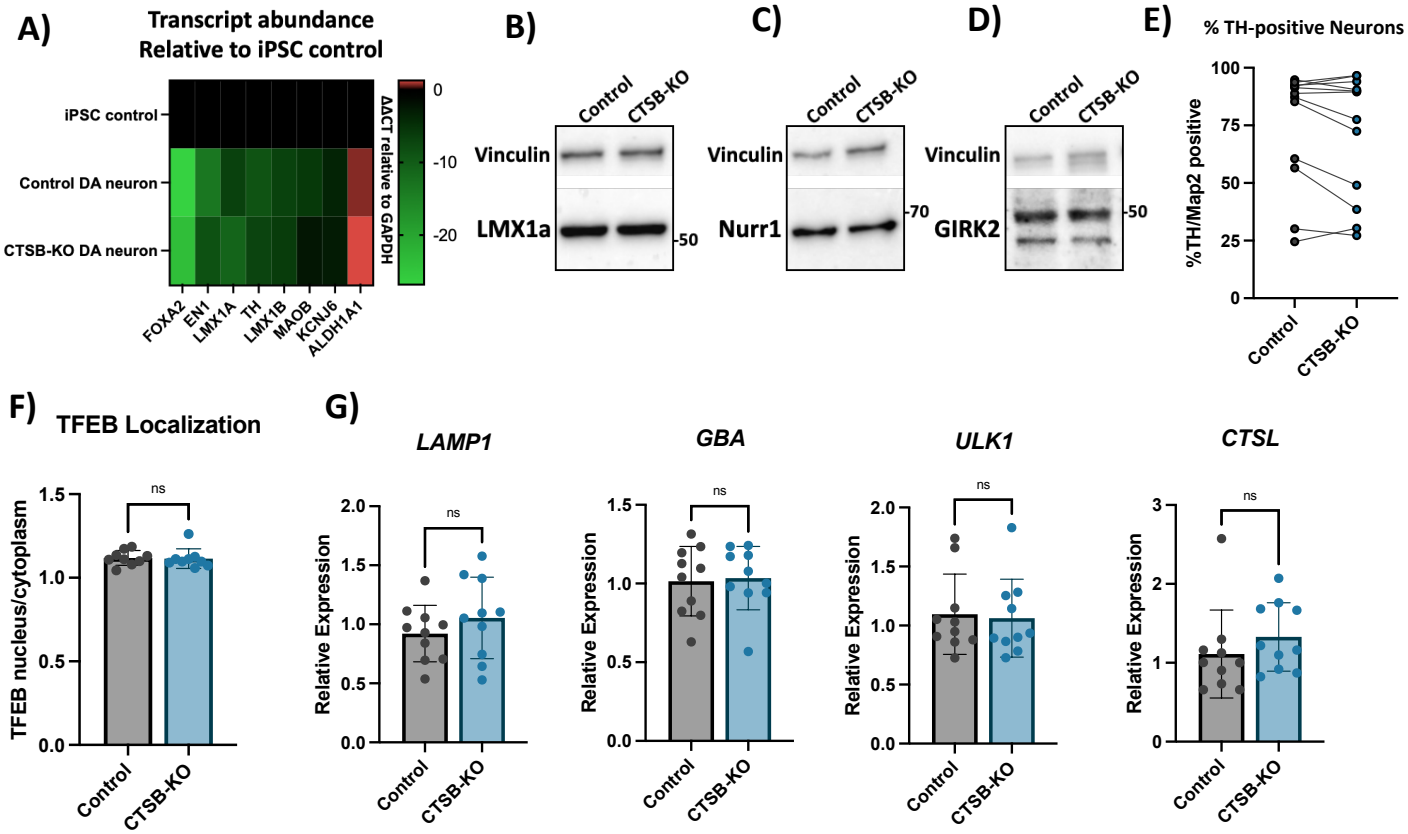

**Figure 8**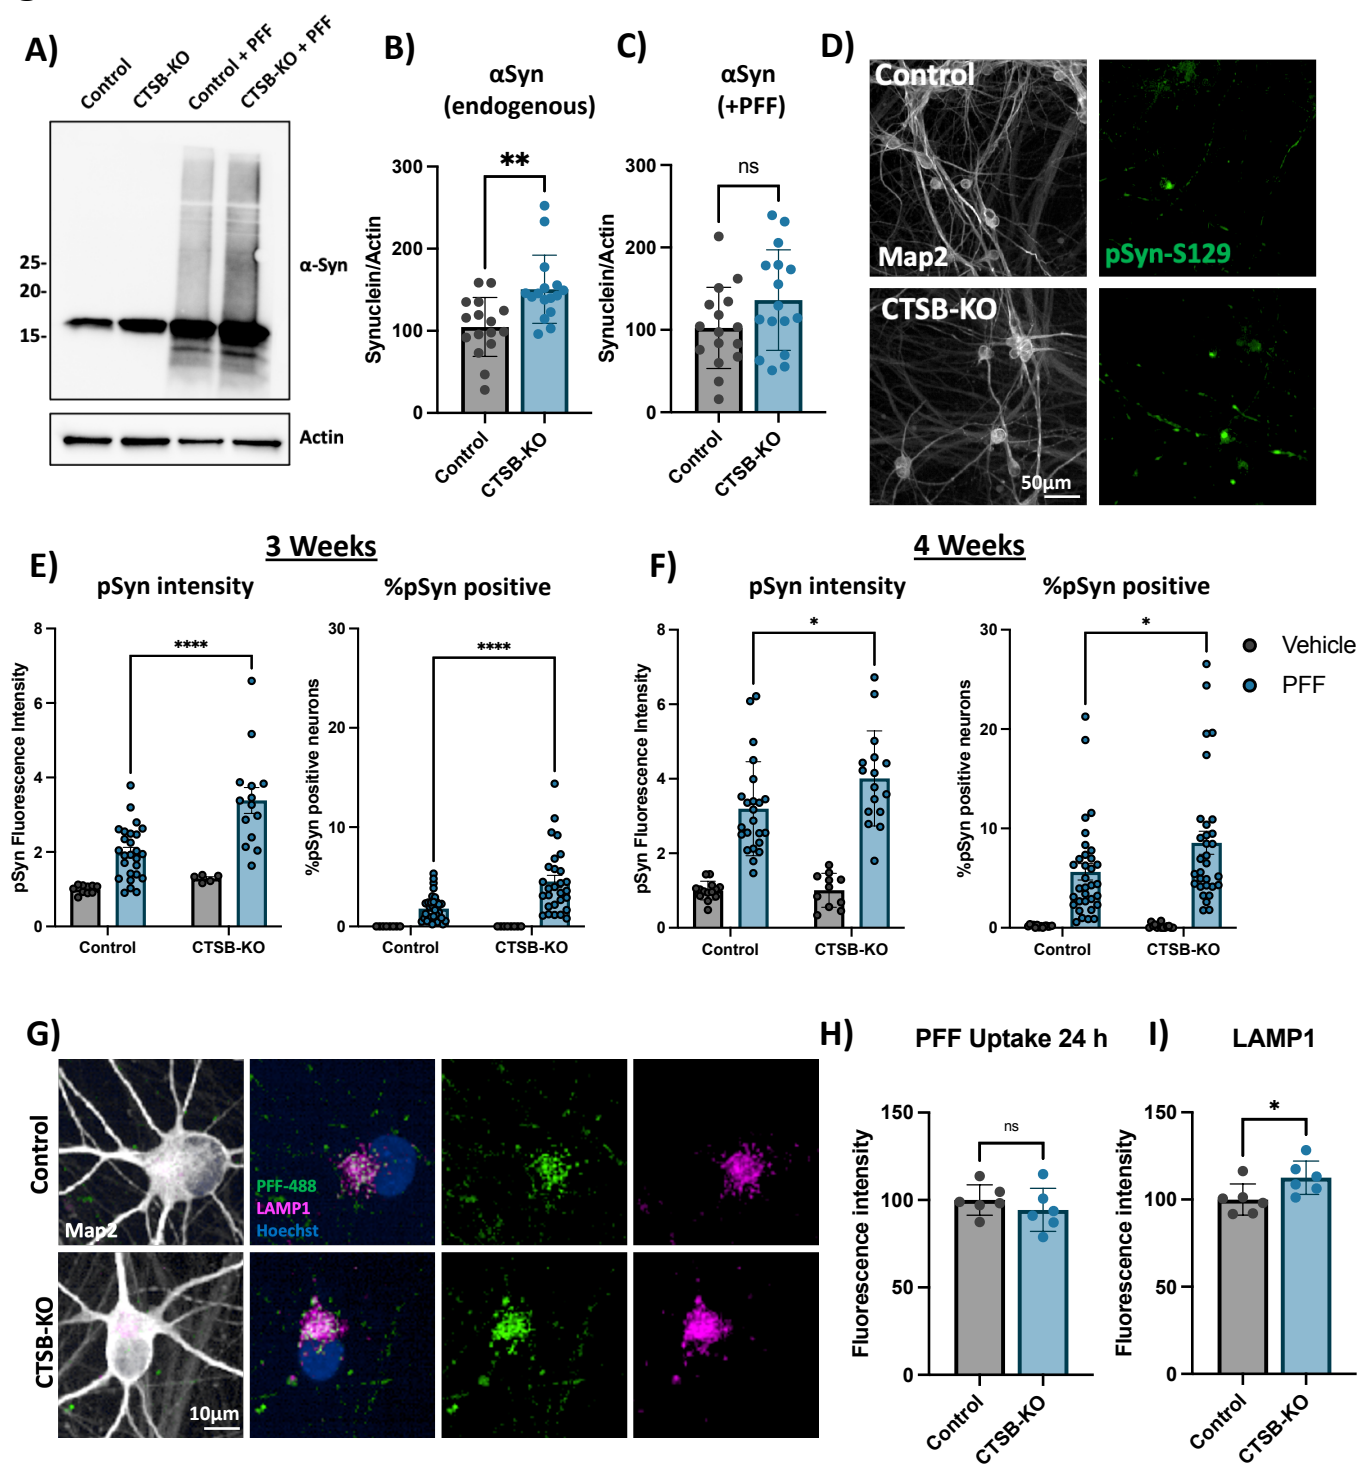



# Supplemental Figure 9

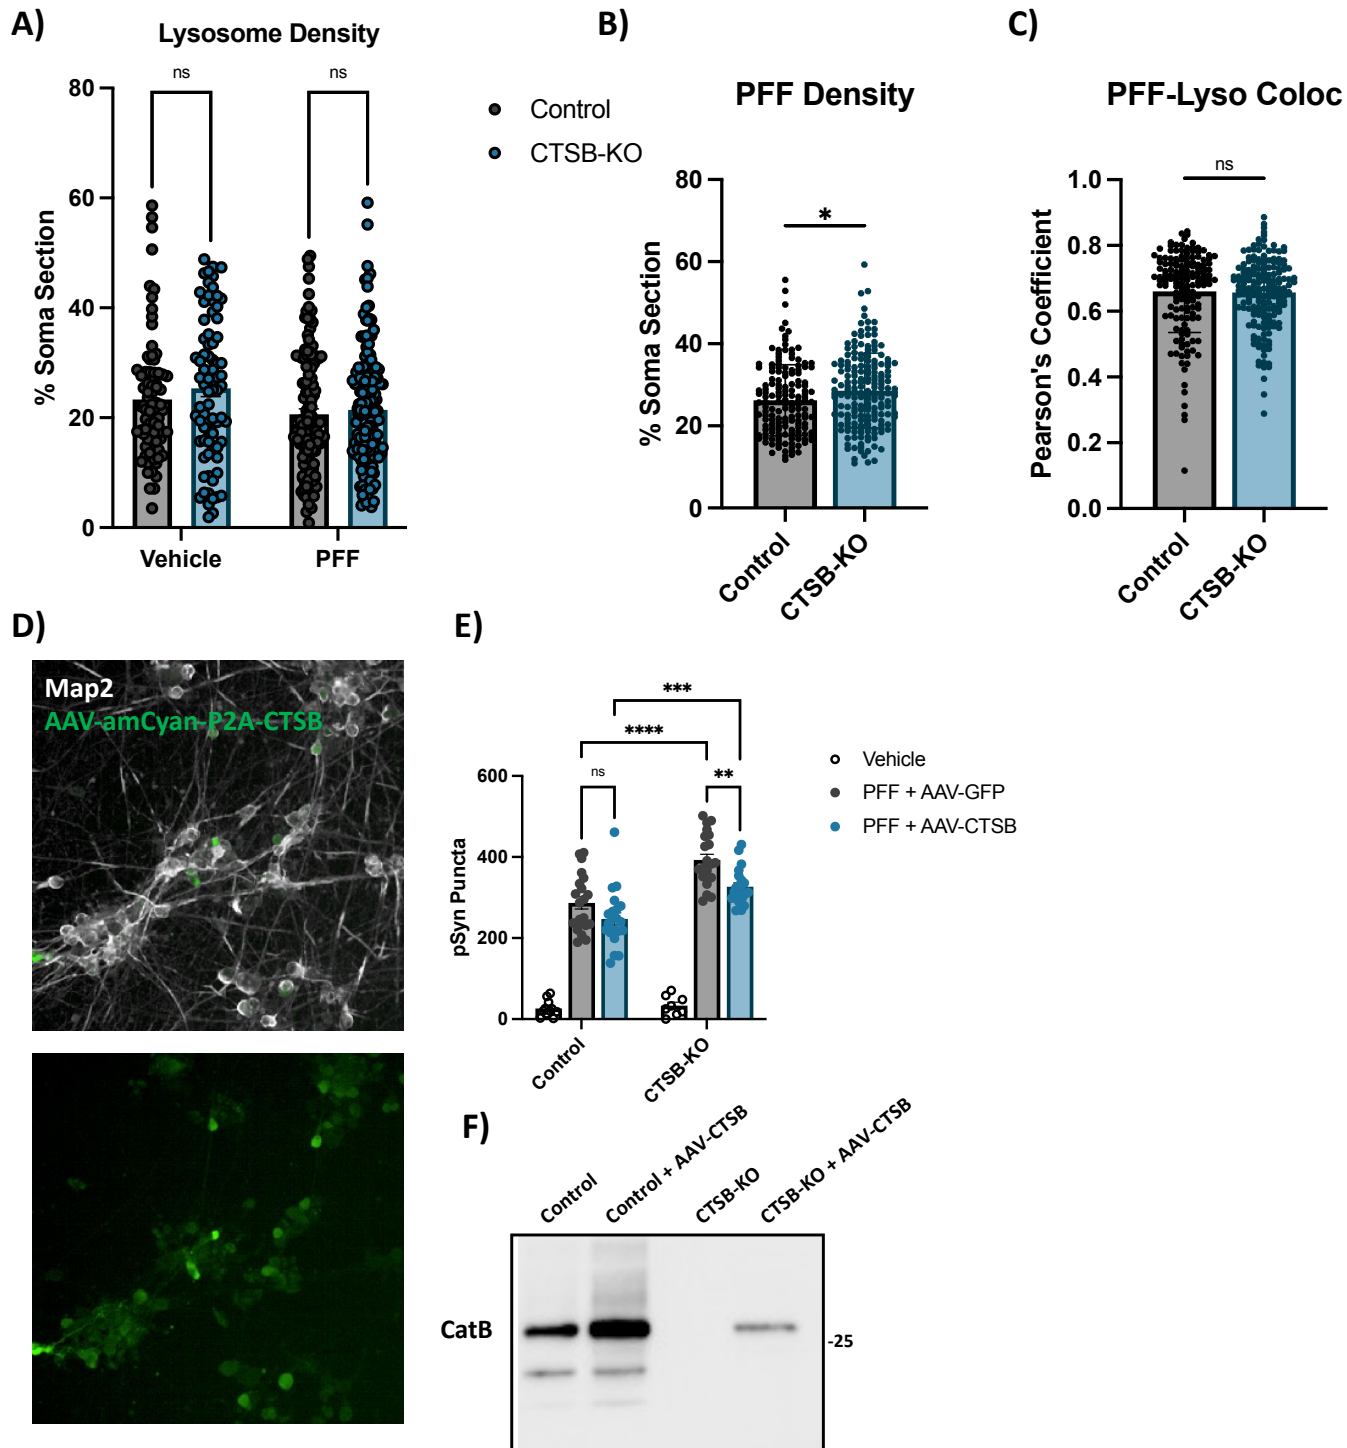

# Figure 9

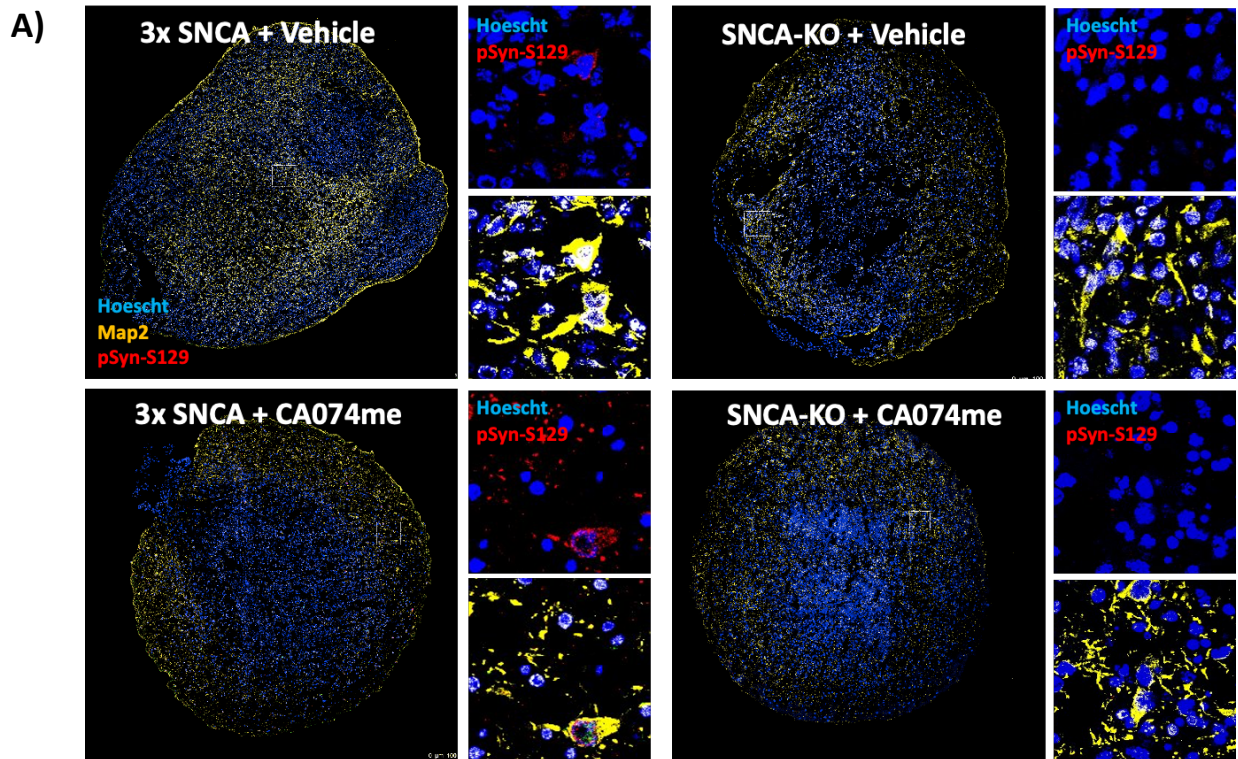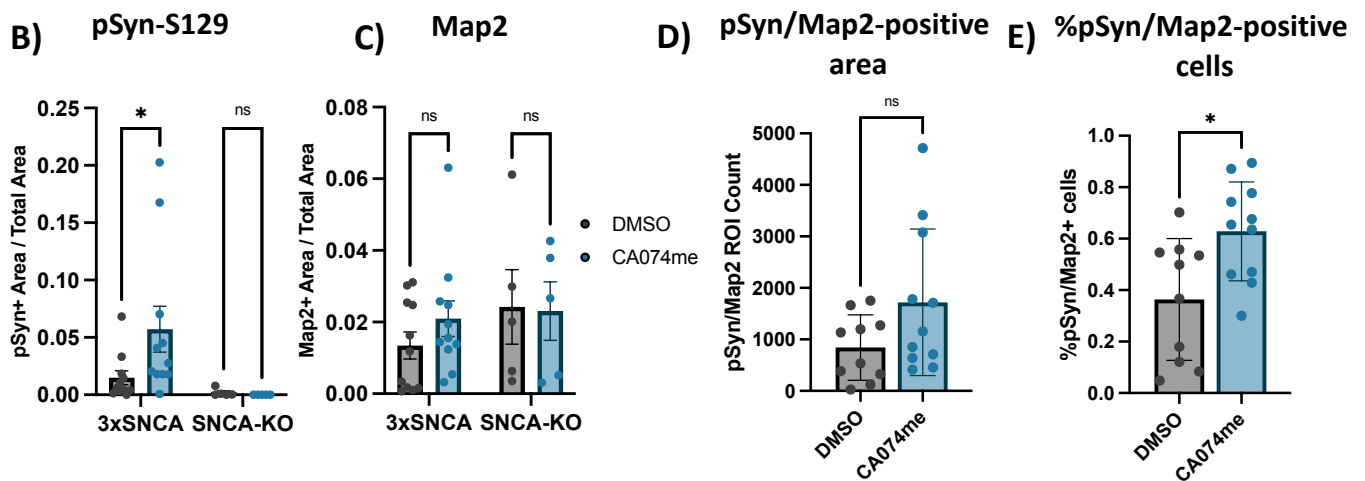

# Supplemental Figure 10

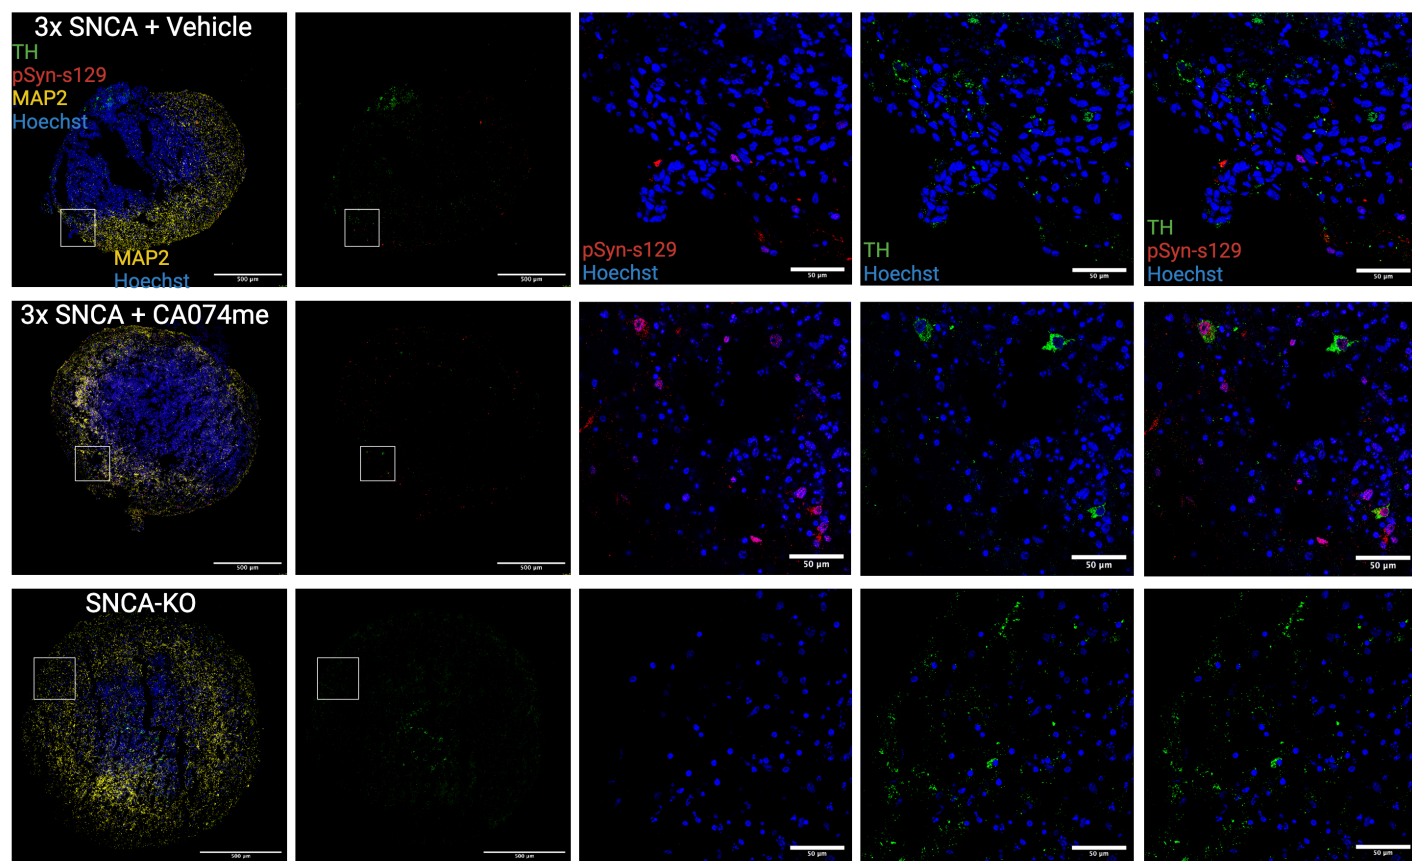

Supplement: 13024_2024_779_MOESM2_ESM.pdf [file 13024_2024_779_MOESM2_ESM.pdf]
